# Supplementary material
Source: MDPI journal article supplement (https://www.mdpi.com/2673-4176/2/3/37)
Supplement: s1 [file s1]

Supplementary material

# Cinnamon Essential Oil Nanocellulose Based-Pickering Emulsions: Processing Parameters Effect on Their Formation, Stabilization, and Antimicrobial Activity

Alana Gabrieli de Souza<sup>1</sup>, Rafaela Reis Ferreira<sup>2</sup>, Elisa Silva Freire Aguiar<sup>3</sup>, Leonardo Zanata<sup>4</sup>, and Derval dos Santos Rosa<sup>5\*</sup>

Statistical results

**Table S1.** Tukey test for CNC-stabilized emulsions for droplet sizes of fresh emulsions.

|                   | PE-1CNC-12-30-3 | PE-0.5CNC-10-30-3 | PE-1CNC-10-20-3 | PE-0.5CNC-12-20-3 | PE-1CNC-10-30-7 | PE-0.5CNC-12-30-7 | PE-1CNC-12-20-7 | PE-0.5CNC-10-20-7 |
|-------------------|-----------------|-------------------|-----------------|-------------------|-----------------|-------------------|-----------------|-------------------|
| PE-1CNC-12-30-3   |                 | 0.5726            | 0.5443          | 0.3441            | 0.9589          | 0                 | 0.4044          | 1                 |
| PE-0.5CNC-10-30-3 | 2.644           |                   | 1               | 0.001273          | 0.9941          | 0                 | 1               | 0.4857            |
| PE-1CNC-10-20-3   | 2.701           | 0.05781           |                 | 0.001076          | 0.992           | 0                 | 1               | 0.458             |
| PE-0.5CNC-12-20-3 | 3.132           | 5.776             | 5.833           |                   | 0.02224         | 0                 | 0.0004467       | 0.4233            |
| PE-1CNC-10-30-7   | 1.541           | 1.102             | 1.16            | 4.673             |                 | 0                 | 0.9702          | 0.9272            |
| PE-0.5CNC-12-30-7 | 13.92           | 11.27             | 11.22           | 17.05             | 12.38           |                   | 0               | 0                 |
| PE-1CNC-12-20-7   | 2.995           | 0.3512            | 0.2934          | 6.127             | 1.454           | 10.92             |                 | 0.3269            |
| PE-0.5CNC-10-20-7 | 0.1783          | 2.822             | 2.88            | 2.954             | 1.719           | 14.1              | 3.173           |                   |

**Table S2.** Tukey test for CNF-stabilized emulsions for droplet sizes of fresh emulsions.

|                   | PE-1CNF-12-30-3 | PE-0.5CNF-10-30-3 | PE-1CNF-10-20-3        | PE-0.5CNF-12-20-3      | PE-1CNF-10-30-7        | PE-0.5CNF-12-30-7      | PE-1CNF-12-20-7        | PE-0.5CNF-10-20-7      |
|-------------------|-----------------|-------------------|------------------------|------------------------|------------------------|------------------------|------------------------|------------------------|
| PE-1CNF-12-30-3   |                 | 0.246             | $4.26 \times 10^{-10}$ | $4.25 \times 10^{-10}$ |
| PE-0.5CNF-10-30-3 | 3.387           |                   | $4.25 \times 10^{-10}$ |
| PE-1CNF-10-20-3   | 11.35           | 14.73             |                        | 0.994                  | 0.6433                 | 0.3344                 | 1                      | $9.18 \times 10^{-10}$ |
| PE-0.5CNF-12-20-3 | 12.45           | 15.84             | 1.105                  |                        | 0.9764                 | 0.8331                 | 0.9983                 | 6.058E-08              |
| PE-1CNF-10-30-7   | 13.85           | 17.23             | 2.498                  | 1.393                  |                        | 0.9998                 | 0.736                  | $1.27 \times 10^{-5}$  |
| PE-0.5CNF-12-30-7 | 14.5            | 17.89             | 3.156                  | 2.051                  | 0.658                  |                        | 0.4235                 | 0.00012                |
| PE-1CNF-12-20-7   | 11.55           | 14.94             | 0.2019                 | 0.9027                 | 2.296                  | 2.954                  |                        | $1.65 \times 10^{-9}$  |
| PE-0.5CNF-10-20-7 | 21.06           | 24.45             | 9.713                  | 8.608                  | 7.215                  | 6.557                  | 9.511                  |                        |

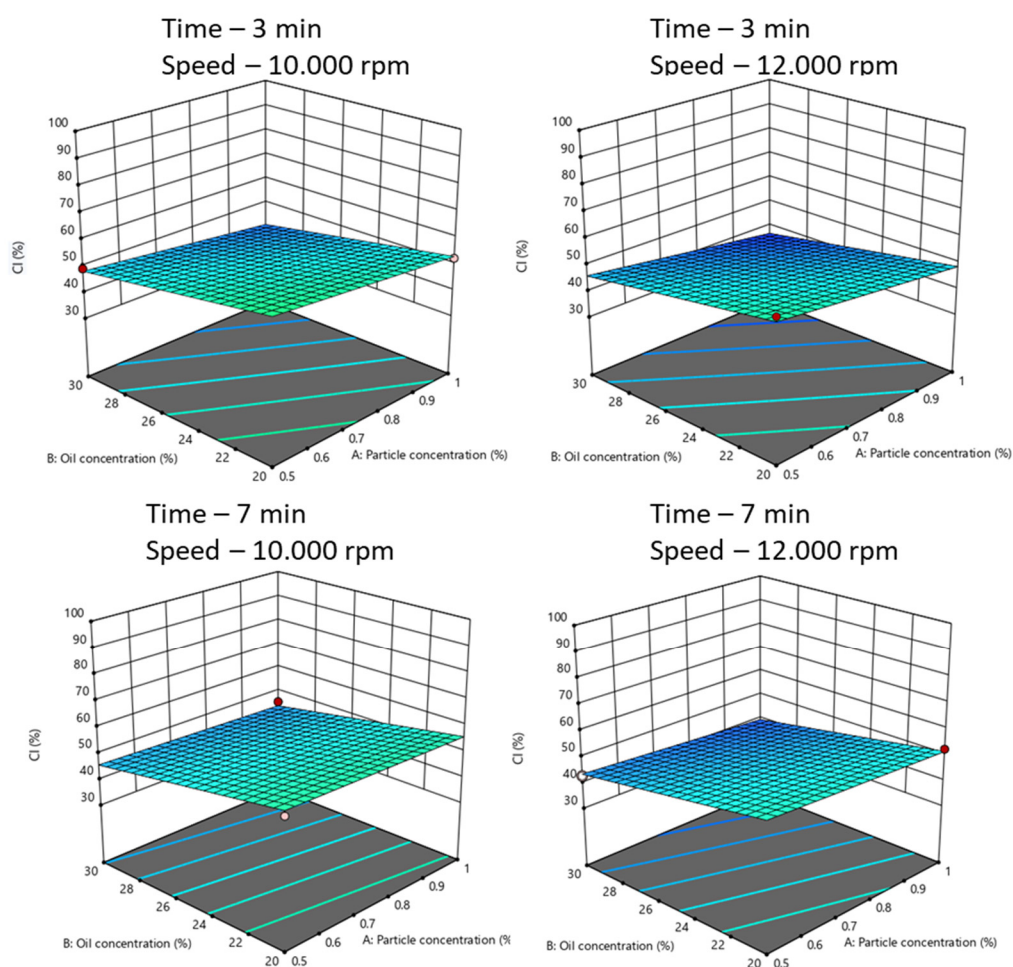

**Figure S1.** Effects of parameters processing on the emulsions creaming index, analyzed by response surface plots.

Like IC graphs (Figure S1), dark, blue-colored graphs are preferable, indicating smaller sizes of average drop diameters. The graphs indicate a trend to oil concentration and homogenization speed to be constant at higher values. Since all emulsions were prepared at the same volume, possibly the conditions of 30% of essential oil and 12,000 rpm increased the energy density of the system, which consequently resulted in smaller average diameters due to the greater energy available to disperse the drops of essential oil and adsorption the CNCs at the oil/water interface.

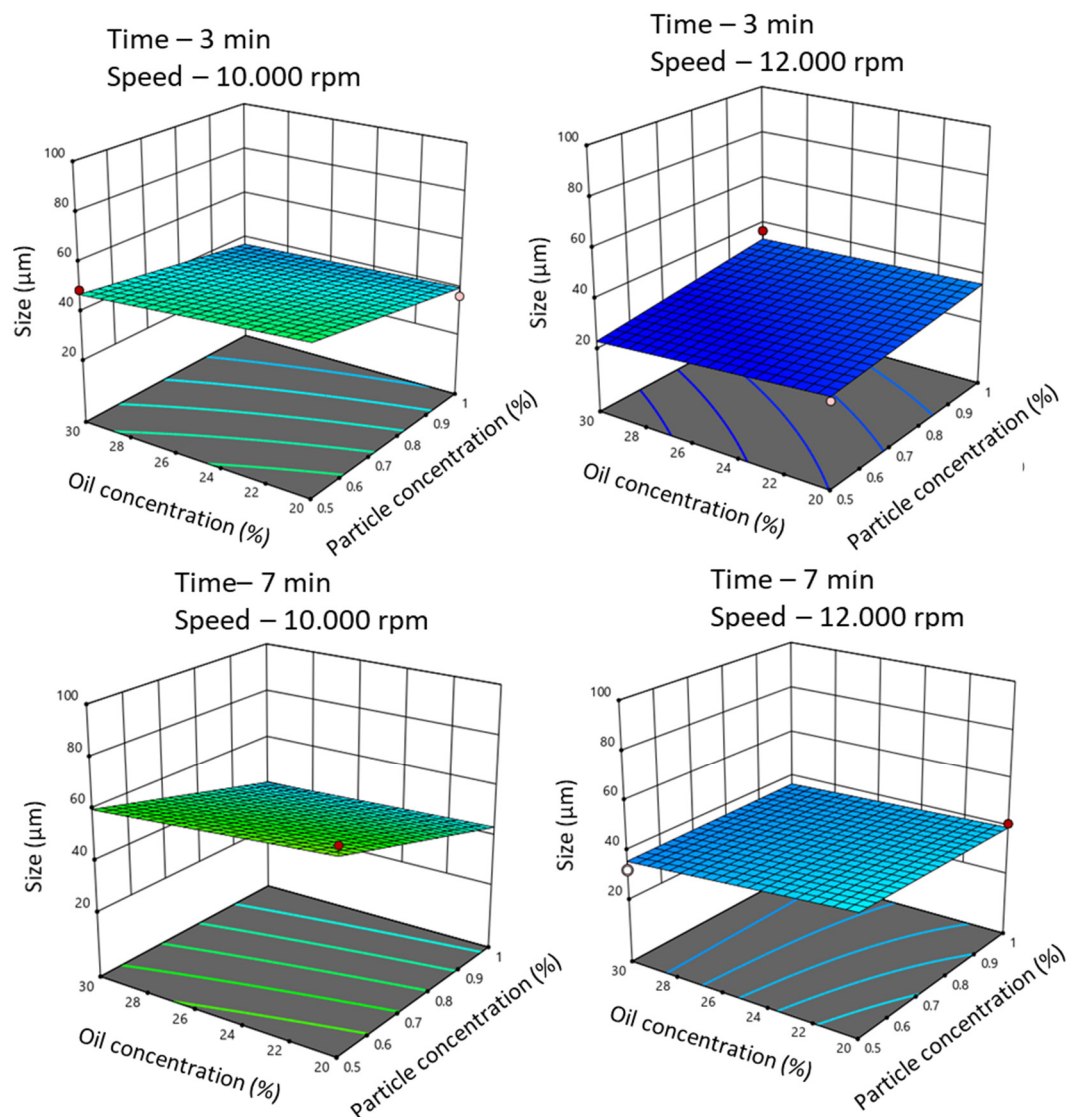

**Figure S2.** Effects of parameters processing on the emulsion's droplet size, analyzed by response surface plots.

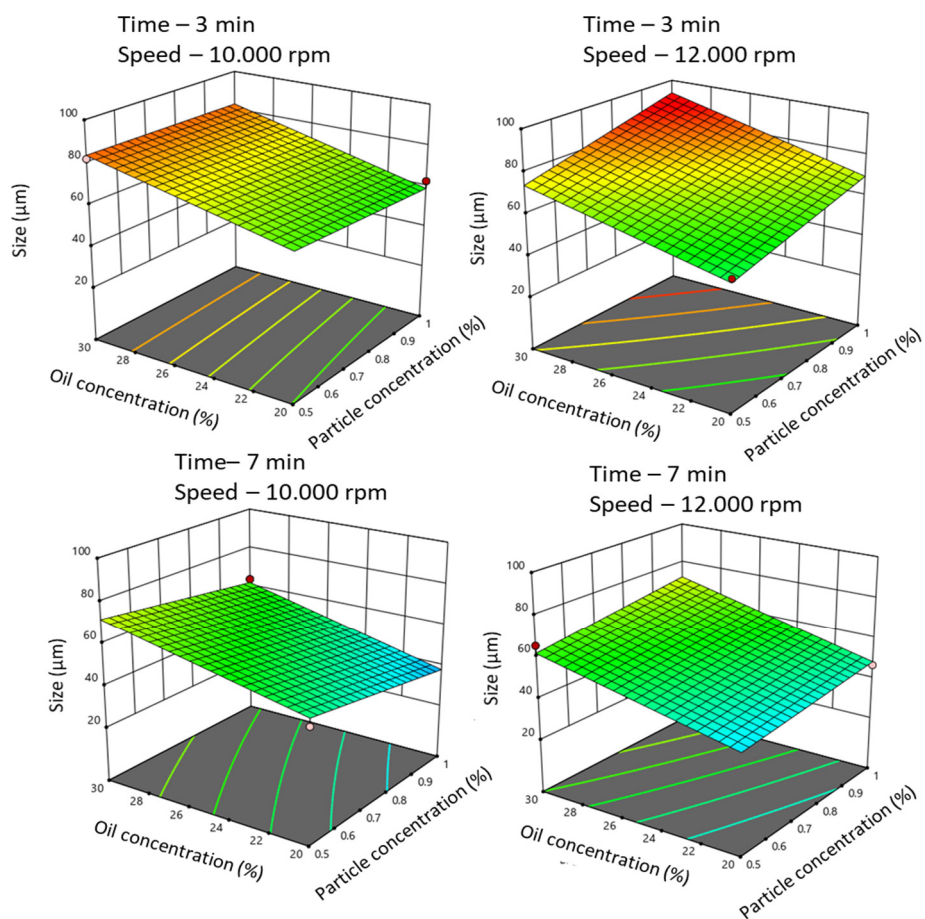

**Figure S3.** Effects of parameters processing on the emulsion's droplet size, analyzed by response surface plots.
